# The involvement of Nrf2 in the protective effects of (-)-Epigallocatechin-3-gallate (EGCG) on NaAsO<sub>2</sub>-induced hepatotoxicity

Xiao-Dong Han<sup>1,2,3,\*</sup>, Yan-Yan Zhang<sup>4,\*</sup>, Ke-Lei Wang<sup>5,\*</sup>, Yong-Pan Huang<sup>6,7</sup>, Zhong-Bao Yang<sup>8</sup> and Zhi Liu<sup>9</sup>

<sup>1</sup>Department of Anesthesia, The Second Affiliated Hospital, Xi'an Jiaotong University, Xi'an, Shaanxi 710049, China

<sup>2</sup>Medical College, Yan'an University, Yan'an, Shaanxi 716000, China

<sup>3</sup>Department of Anesthesia, Xianyang Rainbow Hospital, Xianyang, Shaanxi 712021, China

<sup>4</sup>Department of Pharmacology, Guizhou Medical University, Guiyang, Guizhou 550004, China

<sup>5</sup>Department of Pharmacology, Guiyang Nursing Vocational College, Guiyang, Guizhou 550025, China

<sup>6</sup>Department of Pharmacology, School of Medicine, Hunan Normal University, Changsha, Hunan 410013, China

<sup>7</sup>Xiangya School of Medicine, Central South University, Changsha, Hunan 410078, China

<sup>8</sup>Department of Pharmacy, Affiliated Changsha Hospital of Hunan Normal University, Changsha, Hunan 410006, China

<sup>9</sup>Department of Urology Surgery, The Second Affiliated Hospital of Guizhou Medical University, Kaili, Guizhou 556000, China

\*These authors have contributed equally to this work

**Correspondence to:** Yong-Pan Huang, **email:** yongpanhuangxy@aliyun.com

Zhong-Bao Yang, **email:** yangzhongbao1984@163.com

Zhi Liu, **email:** 18285108551m@sina.cn

**Keywords:** NaAsO<sub>2</sub>, (-)-Epigallocatechin-3-gallate (EGCG), hepatotoxicity, oxidative stress, nuclear factor erythroid 2-related factor 2 (Nrf2)

**Received:** November 24, 2016

**Accepted:** April 27, 2017

**Published:** June 21, 2017

**Copyright:** Han et al. This is an open-access article distributed under the terms of the Creative Commons Attribution License 3.0 (CC BY 3.0), which permits unrestricted use, distribution, and reproduction in any medium, provided the original author and source are credited.

## ABSTRACT

**Arsenic exposure produces hepatotoxicity. The common mechanism determining its toxicity is the generation of oxidative stress. Oxidative stress induced by arsenic leads to the activation of nuclear factor erythroid 2-related factor 2 (Nrf2) pathway. (-)-Epigallocatechin-3-gallate (EGCG) possesses a potent antioxidant capacity and exhibits extensive pharmacological activities. This study aims to evaluate effects of EGCG on arsenic-induced hepatotoxicity and activation of Nrf2 pathway. Plasma activities of alanine aminotransferase, aspartate aminotransferase, alkaline phosphatase, and lactate dehydrogenase were measured; Histological analyses were conducted to observe morphological changes; Biochemical indexes such as oxidative stress (Catalase (CAT), malonyldialdehyde (MDA), superoxide dismutase (SOD), glutathione (GSH), reactive oxygen species (ROS)), Nrf2 signaling related genes (*Nrf2*, *Nqo1*, and *Ho-1*) were assessed. The results showed that EGCG inhibited arsenic-induced hepatic pathological damage, liver ROS level and MDA level. Arsenic decreases the antioxidant enzymes SOD, GPX, and CAT activity and the decrease was inhibited by treatment of EGCG. Furthermore, EGCG attenuated the retention of arsenic in liver tissues and improved the expressions of Nrf2 signaling related genes (*Nrf2*, *Nqo1*, and *Ho-1*). These findings provide evidences that EGCG may be useful for reducing hepatotoxicity associated with oxidative stress by the activation of Nrf2 signaling pathway. Our findings suggest a possible mechanism of antioxidant EGCG in preventing hepatotoxicity, which implicate that EGCG may be a potential treatment for arsenicosis therapy.**

## INTRODUCTION

Inorganic arsenic is a major environmental pollutant with multiple toxic effects in animal and human populations [1, 2]. Arsenic at low levels represent the major source of arsenic exposure and tend to accumulate in the food chain worldwide [3]. Arsenic contamination may occur due to its industrial uses in the production of agricultural pesticides, glass production, and in medicine [4]. Arsenic entering to human body may lead to exceed the permissible limit and cause serious toxicity to human body. Arsenic causes marked damage in various organs, including the liver [5]. It has been demonstrated that arsenic leads to hepatocellular injury, fatty degeneration and progressive fibrosis [1]. However, the molecular mechanisms of hepatotoxicity caused by arsenic are not fully unclear. At present, emerging evidences have indicated that toxic manifestations of arsenic are mainly attributed to oxidative stress [6–8]. It has widely been accepted mechanism to explain the toxicity induced by arsenic [8]. Liver is regarded as target organ for metabolism and detoxification of arsenic. Consequently, in order to reduce arsenic-induced oxidative stress, the development of effective therapeutic strategies is urgently needed. Medications with antioxidants are potentially to decrease the hepatotoxicity induced by arsenic.

Nuclear factor erythroid 2-related factor 2 (Nrf2), a member of the cap'n'collar family of bZIP transcription factors. Nrf2 is activated in response to oxidative stress and toxic damages *in vivo* and *in vitro*. Under homeostatic conditions, Nrf2-dependent transcription is modulated by Kelch-like ECH-associated protein 1 (Keap 1) in the cytoplasm. In response to oxidative or electrophilic stress, keap 1 dissociates, then Nrf2 translocates into the nucleus and activates its downstream's target genes, resulting in the up-regulation of detoxifying enzyme and antioxidant proteins such as Hmox-1, NQO-1, glutathione transferase (Gst), and glutathione (GSH) [9, 10]. Recent studies have indicated that activation of the Nrf2 pathway could alleviate numerous liver disorders.

(-)-Epigallocatechin-3-gallate (EGCG) is the most abundant and active polyphenol in green tea and widely consumed as an antioxidant. The biologic properties of EGCG has been reported that such as being antioxidant hepatoprotection and studies have indicated the protective role of EGCG in many diseases including cancer and cardiovascular diseases [11]. These mentioned diseases associated with the putative benefits of EGCG is linked to its strong free radical scavenging and antioxidant properties. Some studies have suggested the ameliorating effect of EGCG against metal-induced hepatotoxicity *in vitro* model [12]. However, the mechanism by which EGCG elicits hepatoprotective and antioxidant effects in association with Nrf2 is unclear. Therefore, the aim of the present study was to evaluate the protective effects of EGCG on arsenic-induced hepatic oxidative injury and

to elucidate the mechanisms underlying these protective effects.

## RESULTS

### EGCG alleviated NaAsO<sub>2</sub>-induced liver damage *in vivo* and *in vitro*

It is reported that the activities of alanine aminotransferase (ALT), aspartate aminotransferase (AST), alkaline phosphatase (ALP), and lactate dehydrogenase (LDH) reflect the integrity of plasma membranes in liver tissue and hepatocytes. To investigate the effect of EGCG on NaAsO<sub>2</sub>-induced liver injuries, the concentration of these cytoplasmic enzymes were tested in liver tissue. As shown in Figure 1, the concentrations of ALT, AST, ALP and LDH in liver tissue increased markedly in rats, which treated with NaAsO<sub>2</sub> throughout the experiment. Treatment with EGCG significantly decreased the levels of those enzymes induced by NaAsO<sub>2</sub>. Meanwhile, administration of EGCG alone did not affect those enzyme activities.

To further elucidate the protective mechanism of EGCG on NaAsO<sub>2</sub>-induced injury in hepatocytes, the levels of ALT, AST, ALP, and LDH were also investigated. As shown in Figure 2, an increase in ALT, AST, ALP, and LDH were detected exposure to NaAsO<sub>2</sub>. However, treatment with EGCG, these enzymes were dramatically decreased dose-dependently.

To further confirm the protective effect of EGCG on NaAsO<sub>2</sub>-induced liver damage, we examined liver histology in tissues from the treated mice. Arsenic exposure resulted in dim boundary of hepatocyte, dismissed cell membrane, cytoplasm disintegrating pieces, and the accumulation of lipid droplets intracytoplasm, the specific hepatocyte balloon degeneration performance. All these changes were mitigated by EGCG. EGCG alone did not cause morphological changes in the liver (Figure 3).

### EGCG reduced the oxidative damage induced by NaAsO<sub>2</sub> in rat

As shown in Figure 4, the activities of SOD, CAT and GSH were reduced and MDA was increased in NaAsO<sub>2</sub>-treated rat compared with the control group. However, treatment with EGCG caused a significant increase in SOD, CAT and GSH activity and decreased the levels of MDA compared with the NaAsO<sub>2</sub>-treated group. These results collectively suggested that EGCG could attenuate NaAsO<sub>2</sub>-induced oxidative stress (Figure 4A, 4B, 4C, 4D).

### EGCG reduced liver total arsenic concentration

To further confirm the effect of EGCG on NaAsO<sub>2</sub> in liver, the levels of arsenic were determined. As shown

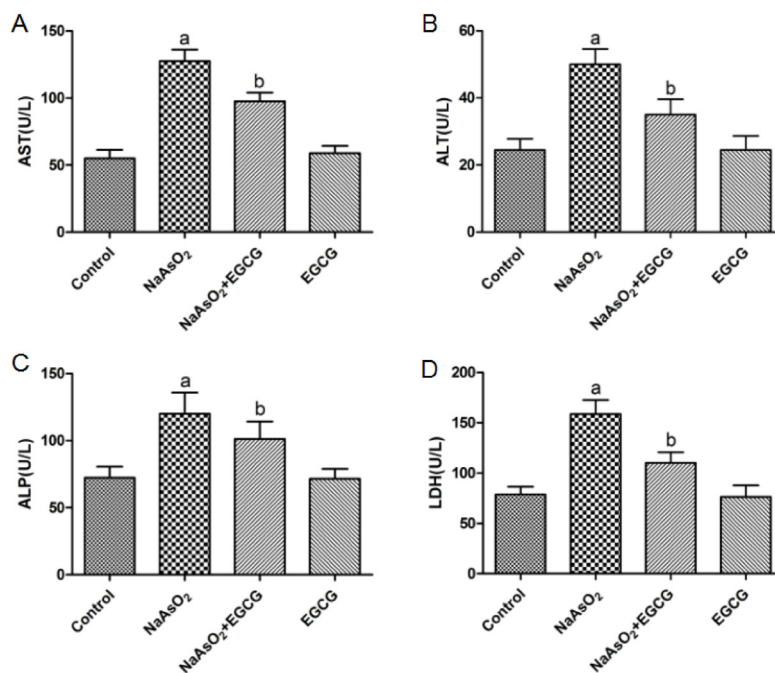

**Figure 1: Effects of NaAsO<sub>2</sub> and/or EGCG administration on indices related to hepatotoxicity in rats. (A) AST, (B) ALT, (C) ALP, (D) LDH. Data are represented as the means ± SEM. Vs control, <sup>a</sup>*P*<0.05; Vs NaAsO<sub>2</sub> group, <sup>b</sup>*P*<0.05.**

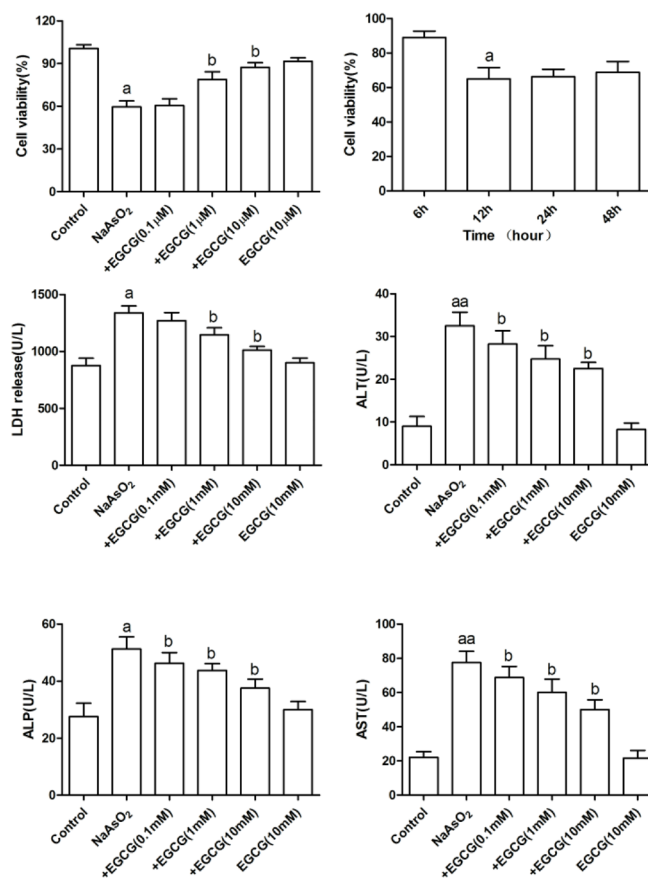

**Figure 2: Effects of EGCG on NaAsO<sub>2</sub>-induced hepatocytes damage and oxidative stress. Data are represented as the means ± SEM. Vs control, <sup>a</sup>*P*<0.05, <sup>aa</sup>*P*<0.01; Vs NaAsO<sub>2</sub> group, <sup>b</sup>*P*<0.05.**



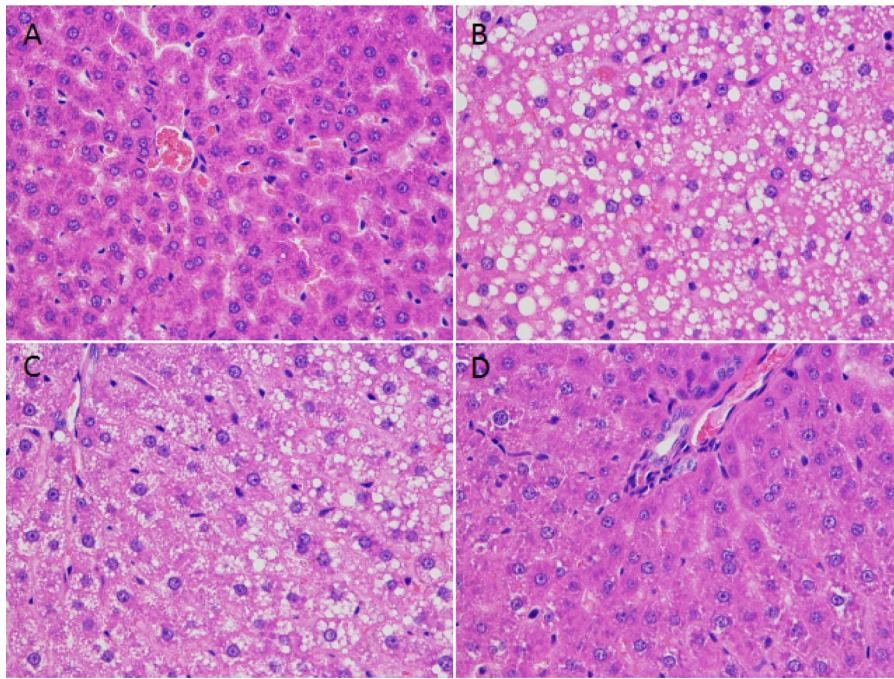

**Figure 3: Morphological changes in mouse liver after NaAsO<sub>2</sub> and/or EGCG.** (A) Control group, normal structure of hepatic cord, hepatic sinusoid, and hepatocyte. (B) NaAsO<sub>2</sub> group, the basic performance of the hepatocyte poisoning could be found in NaAsO<sub>2</sub> treatment group, such as dim boundary of hepatocyte, dismissed cell membrane, cytoplasm disintegrating pieces, and the accumulation of lipid droplets intracytoplasm; meanwhile, the specific hepatocyte balloon degeneration performance can be observed. At the same time, inflammatory cells infiltration scattered in the liver tissue. (C) NaAsO<sub>2</sub>+EGCG group, fatty degeneration of hepatocytes and congestion but not observed balloon degeneration and hepatocyte disintegration. (D) EGCG group, normal structure of liver cells as control group (200×).

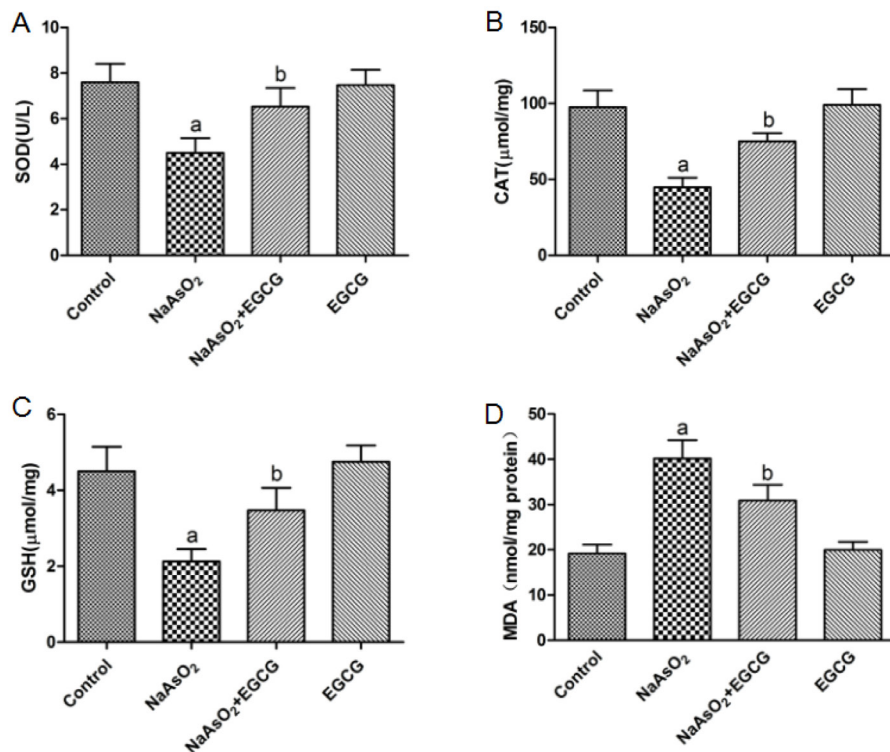

**Figure 4: Effects of EGCG on the NaAsO<sub>2</sub>-induced oxidative stress of liver in rats.** (A) SOD, (B) CAT, (C) GSH, (D) MDA Vs control, <sup>a</sup>*P*<0.05; Vs NaAsO<sub>2</sub> group, <sup>b</sup>*P*<0.05.

in Figure 5, there existed a significant increase in the liver levels of arsenic in NaAsO<sub>2</sub>-treated rats. EGCG decreased obviously arsenic accumulation induced by NaAsO<sub>2</sub>.

### EGCG attenuated NaAsO<sub>2</sub>-induced injuries and decreased ROS generation in hepatocytes

Arsenic-related injuries have been regarded to be associated with over-production of ROS. To determine the effect of EGCG on NaAsO<sub>2</sub>-induced oxidative stress, we examined the intensity of total ROS by incubating hepatocytes with 10μM DCF fluorescence-AM. As shown

in Figure 6, arsenic significantly increased fluorescence, indicating that NaAsO<sub>2</sub> increased ROS generation in hepatocytes. Treatment with EGCG significantly decreased concentration of ROS in hepatocytes (Figure 6).

### EGCG down-regulated the expression levels of Nrf2 pathway related genes in liver tissues and hepatocytes

Inorganic arsenic could stimulate the activation of Nrf2 pathway. To determine the effect of EGCG on Nrf2 pathway related genes. Firstly, Nrf2 protein levels were

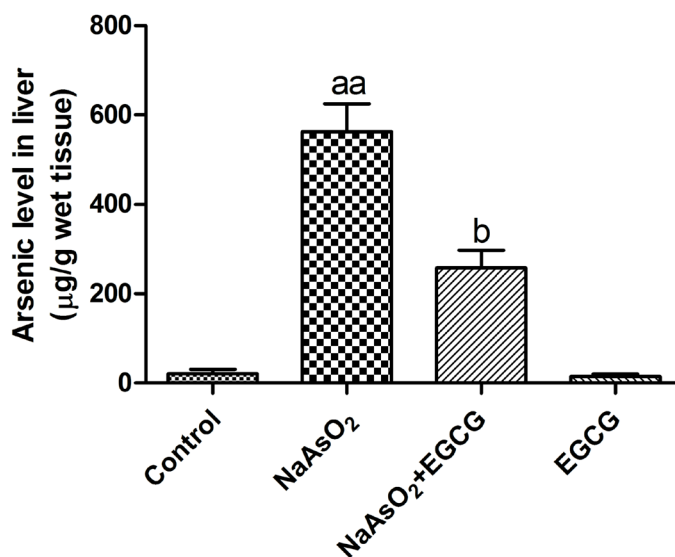

Figure 5: Effects of EGCG on the arsenic accumulation in the liver. Vs control, <sup>aa</sup>*P*<0.01; Vs NaAsO<sub>2</sub> group, <sup>b</sup>*P*<0.05.

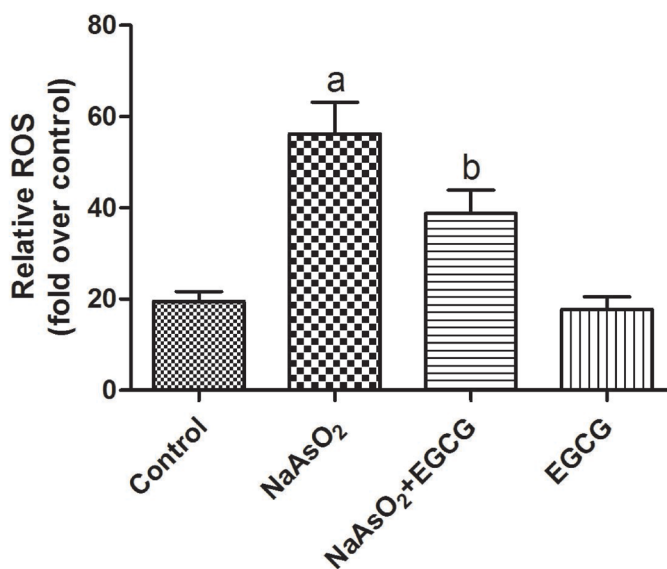

Figure 6: Effects of EGCG on ROS generation in rats. Vs control, <sup>a</sup>*P*<0.05; Vs NaAsO<sub>2</sub> group, <sup>b</sup>*P*<0.05.

assessed at different time interval (6h, 12h, 24h, 48h). Western blot analysis results showed that the total cellular Nrf2 protein levels obviously increased at 12 h (Figure 7), and decreased thereafter, consistently with the results of 1  $\mu$ mol/L NaAsO<sub>2</sub> treatment in hepatocytes. Accordingly, in the subsequent experiments, we chose 12 h as the longest exposure time.

Activation of Nrf2 has been found to be associated with arsenic. To determine the changes of Nrf2 mRNA by NaAsO<sub>2</sub> exposure. Real-time PCR and western blot results showed that NaAsO<sub>2</sub> exposure caused increases in the expression of Nrf2 in hepatocytes (Figure 8). EGCG significantly inhibited the over-expression of Nrf2 mRNA and protein. EGCG alone showed no changes on expressions of Nrf2 mRNA in Chang human hepatocytes.

To further assess whether arsenic-induced Nrf2 activation could affect the expressions of Nrf2 pathway-related genes including NQO1 and HO-1, western blot analysis were applied to determine the expressions of NQO1 and HO-1 in Chang human hepatocytes. As shown in Figure 8A, 8B, 8C, 8D, 8E, arsenic moderately up-regulated NQO1 and HO-1 protein and mRNA expression, EGCG down-regulated the protein expressions of NQO1 and HO-1.

We next determined the expression levels of NQO1 and HO-1 gene. As depicted in Figure 8F, 8G, 8H,

arsenic obviously increased the expressions of NQO1 and HO-1 gene. Meanwhile, induction of HO-1 gene was more dramatic than NQO1, which were consistent with NQO1 and HO-1 protein expressions. EGCG inhibited the activations of these proteins in NaAsO<sub>2</sub>-induced hepatotoxicity. These suggested that EGCG exerted protective effects on arsenic-induced hepatotoxicity through inhibition of Nrf2-mediated signaling pathway.

## DISCUSSION

The herein presented study describes the effects of EGCG on the NaAsO<sub>2</sub>-induced Nrf2 signaling for hepatotoxicity. EGCG could attenuate the arsenic-induced hepatotoxicity through the Nrf2 signaling pathway.

Chronic arsenic exposure through polluted environment causes abnormal liver function, hepatomegaly, hepatoportal sclerosis, liver fibrosis and cirrhosis. However, accumulating evidences have revealed that the exact mechanisms by which arsenic-induced hepatotoxicity are not fully elucidated. It has been shown that oxidative stress and inflammation are the main causes in the pathogenesis of arsenic-induced organ damage [13]. Emerging evidences have support the widely accepted theory that oxidative stress is one of important mechanisms in arsenite and other arsenicals

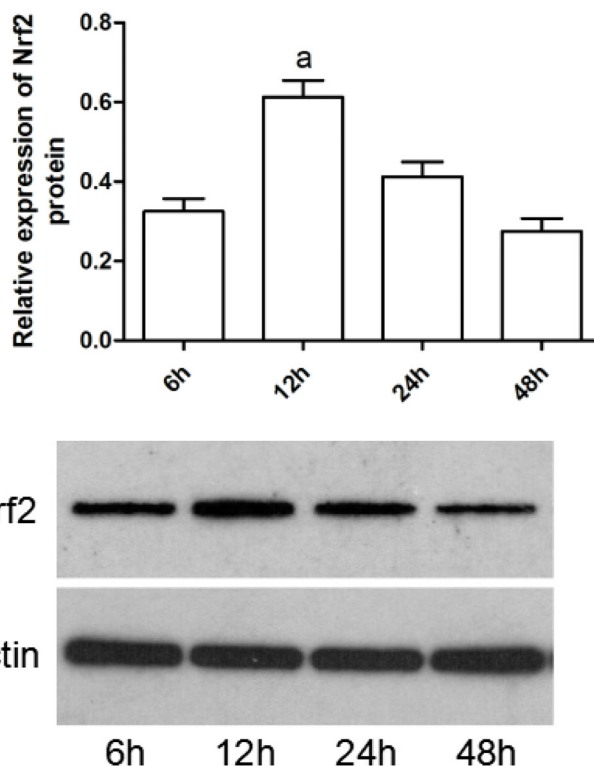

**Figure 7: NaAsO<sub>2</sub> increases total cellular Nrf2 protein levels in hepatocytes.** Whole-cell protein extracts were separated by SDS-PAGE, and western blot analysis was conducted using antibodies of Nrf2 and  $\beta$ -actin, respectively. Cells were treated with 1  $\mu$ mol/L of NaAsO<sub>2</sub> for 6, 12, 24, and 48h. Data were mean  $\pm$  SEM from three different samples. Vs control, <sup>a</sup> $P < 0.05$ ; Vs NaAsO<sub>2</sub> group, <sup>b</sup> $P < 0.05$ .

induced hepatotoxicity [14–17]. Several lines of studies have shown that arsenic could cause excessive production of ROS in various tissues [17, 18]. These oxidants enhance the generation of ROS and exhausted antioxidant defense enzymes, such as catalase, superoxide dismutase and GPx, cause oxidative stress and lead to damage in lipid. [19]. Literatures have reported that the toxic effects of arsenic are due to its ability to induce reactive oxygen species [13]. In present study, we found that NaAsO<sub>2</sub> could induce oxidative stress and liver injury *in vivo* and *in vitro*. NaAsO<sub>2</sub> enhanced the levels of injury markers such as ALT, AST, ALP and LDH and MDA content, showed decreases in the activities of antioxidative enzymes, including SOD, CAT, GSH compared with control group. Furthermore, noticeable morphological changes found in the liver further confirmed the adverse actions of NaAsO<sub>2</sub> on the liver. These results strongly suggested that NaAsO<sub>2</sub>

disrupted the balance between oxidant and antioxidant agents and demonstrated NaAsO<sub>2</sub>-induced liver oxidative damage. Administration of EGCG apparently could attenuate the arsenic-induced hepatotoxicity including lowering the levels of transaminase, reversal the activities of SOD, CAT, GSH in liver tissue. These findings suggested that EGCG could protect liver from arsenic-induced hepatotoxicity.

Nrf2 is a basic leucine zipper redox-sensitive transcription factor that controls the redox state of cell in harmful stresses [20]. Under physiological conditions, Nrf2 is localized in the cytoplasm and anchored by its inhibitor, Keap 1. However, under conditions of oxidative stress, Nrf2 dissociates from Keap 1, translocates into the nucleus and regulates the expression of antioxidant genes including HO-1 and NQO-1 via interaction with the antioxidant response element. In addition, accumulating

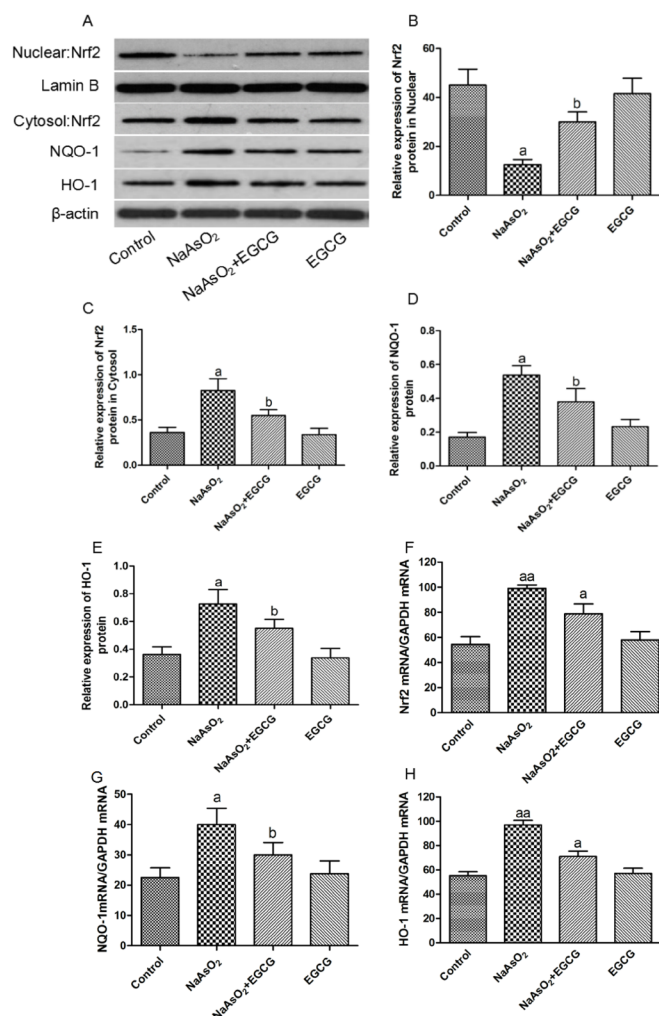

**Figure 8: Effects of EGCG on NaAsO<sub>2</sub>-induced Nrf2, NQO-1 and HO-1 expressions in hepatocytes.** Data were mean  $\pm$ SEM from three different samples. (A) Western blotting data showed that the translocation of Nrf2 from cytosol into nucleus using nucleus fraction and the protein expressions of Nrf2, NQO-1 and HO-1. (B) Relative expression of Nrf2 protein in Nucleus. (C) Relative expression of Nrf2 protein in Cytosol. (D) Relative expression of NQO-1 protein. (E) Relative expression of HO-1 protein. (F) mRNA expression of Nrf2. (G) mRNA expression of NQO-1. (H) mRNA expression of HO-1. Vs control, <sup>a</sup> $P < 0.05$ , <sup>aa</sup> $P < 0.01$ ; Vs NaAsO<sub>2</sub> group, <sup>b</sup> $P < 0.05$ .



reports have demonstrated that Nrf2 involves in the arsenic-induced oxidative stress. Till now, Nrf2 has been proven to act as a harmful factor in many pathological processes and activated in arsenic-related hepatotoxicity [21]. These pathologies typically involve induction of genes that are regulated by Nrf2 in specific tissues. The beneficial effects of Nrf2 were identified early as a central part of the biphasic protective response induced after exposure to oxidative stress [22]. It has been demonstrated that Nrf2 activation involved in arsenic induced-cell damage including human hepatocytes, indicating that Nrf2 pathway activation by arsenic is a kind of cellular ubiquitous phenomenon, and play indispensable roles for the cellular defense against arsenic hepatotoxicity [23–25]. Recent studies have shown that expression of Nrf2 and its target genes initially increased and then gradually fell over the duration of arsenic exposure [22]. Several evidences have been depicted for arsenic exposure may activate Nrf2 pathway to maintain cell physiological function [26]. Several lines of evidence showed that Nrf2 could bind to ARE and activate its downstream target genes [27, 28]. In this study, arsenic induced Nrf2 expression, furthermore, our data showed that NQO-1, HO-1 levels up-regulate in arsenic-induced hepatotoxicity. These findings were in consistent with previous studies. However, treatment with EGCG reversed above mentioned injuries. And also these results were also consistent with up-regulation of Nrf2 target genes. Our results indicated that EGCG may serve as an enhancer of antioxidative stress.

In summary, we demonstrated that EGCG could alleviate arsenic-induced oxidative stress and liver injury through activating the Nrf2 pathway. As oxidative damage is an important toxic mechanism of arsenic and is associated with the pathological processes of diverse liver diseases, we believe EGCG could be useful in treating many liver disorders through reducing oxidative stress by activating Nrf2 pathway.

## **MATERIALS AND METHODS**

### **Preparation of arsenic and EGCG**

Arsenic dose selection in the present study was based on the previous report [13, 29]. Arsenic as sodium arsenite at a dose of 5 mg/kg bw/day was dissolved in water and treated orally. EGCG, purchased from Sigma Aldrich Corporation (Shanghai, China) with a purity of 98%, was dissolved in distilled water and each rat received daily 1 ml at a dose of 40 mg/kg bw/day administrated orally just after exposure to arsenic by intragastric intubation throughout the experimental period. The stock suspension was prepared with distilled water and stored at 4°C for two days (concentration: 50 mg/mL). Throughout all the experiments, the characteristics of all the drugs have not changed.

### **Cell culture**

Chang human hepatocyte line (number ZN1003, Cell Bank of Chinese Academy of Sciences, Shanghai, China) was cultured in RPMI medium 1640 (Gibco, USA) supplemented with 10% fetal bovine serum (FBS, Tianjin Bio, China) and antibiotics (100 U/mL penicillin and 100µg/mL streptomycin, Sigma, USA). All cell cultures were maintained in a humidified and 37°C incubator with 5% CO<sub>2</sub> and 95% air. Cells were subcultured with 0.25% trypsin (Gibco, USA) at a ratio of 1 : 3 and used at 75%-80% confluence for the following experiments.

### **Assessment of viability by MTT assay**

Cell viability was determined by the MTT assay (Beyotime, Beijing, China). The cells were seeded at  $1 \times 10^4$  cells/well in 96-well plates. After treatment with control or NaAsO<sub>2</sub> (1µM) or NaAsO<sub>2</sub>+EGCG for 12h, 20 µl of 5 mg/ml MTT solution was added to each well, and incubated for 4 h. The supernatants were aspirated, and the formazan crystals in each well were dissolved in 150 µl of dimethyl sulfoxide. The absorbance was measured at 570 nm using a micro plate reader (Spectrafluor, TECAN, sunrise, Austria).

### **Ethics statement**

All animal experiments were performed according to institutional ethical committee guidelines and approved by the Medical Ethics Committee of Central South University and were in accordance with the US National Institutes of Health Regulations for the Care and Use of Animals (NIH Publication No.85-23, revised 1996). All efforts were made to minimize suffering.

### **Animals and pharmacological treatment *in vitro* and experimental protocol**

Adult male albino rats of Male Sprague-Dawley (SD) weighing 180g to 220 g were used for the experiment. The animals were housed in polypropylene cages and maintained in 12-h light/12-h dark cycle, 50% humidity and  $25 \pm 2^\circ\text{C}$ . The animals had free access to standard pellet diet (M/S. Pranav Agro Industries Ltd., Bangalore, India) and water ad libitum. This study was approved by Institutional Animal Ethics Committee of Central South University and the study was conducted in accordance with the “Guide for the Care and Use of Laboratory Animals”.

All animals were randomly assigned to the following groups with 10 animals/group as followed: control (saline), NaAsO<sub>2</sub> (5 mg/kg/day), NaAsO<sub>2</sub>+EGCG (dissolved in saline, 50 mg/kg/day, i.g.) and EGCG (dissolved in saline, 50 mg/kg/day, i.g.). The rats of control group and EGCG group were supplied with saline for



30 days. Rats in the NaAsO<sub>2</sub> group and NaAsO<sub>2</sub>+EGCG group were supplied with NaAsO<sub>2</sub>-containing drinking water (50 mg/kg) for 30 days. On 31 day, the rats were euthanized for following experiments. At the end of the experimental period, the animals in different groups were given by an intraperitoneal injection of Chloral hydrate (0.03 mg/kg), then opened the chest of animal. Blood samples were collected through heart puncture in two different tubes. One is heparinised, for plasma and another without heparin for serum collection. Serum and plasma were separated by centrifugation and used for various biochemical estimations.

### **Determination of tissue hepatotoxicity enzymatic indices**

Tissue samples were assayed for the determination of liver enzymes (AST: Aspartate transaminase, ALT: alanine aminotransferase, alkaline phosphatase (ALP) and oxidative stress related enzymes (CAT: Catalase, MDA: malonyldialdehyde, SOD: superoxide dismutase and GSH: Glutathione) by kits using an automatic chemical analyzer (7060, Hitachi, Tokyo, Japan) according to manufacturer's instructions. The tissues were removed, rinsed with physiological saline and immediately weighed. All the samples were stored at -70°C throughout the experimental period.

### **Measurement of ROS production**

Measurement of mitochondrial ROS was performed as previously described. Hepatocyte from each group were suspended in PBS and incubated with 50 μM 2',7'-dichlorofluoresin diacetate (DCFH-DA) in modified Krebs solution (135 mM NaCl, 5.9 mM KCl, 1.5 mM CaCl<sub>2</sub>, 1.2 mM MgCl<sub>2</sub>, 11.5 mM glucose, 11.6 mM HEPES, pH 7.4) supplemented with 0.1% bovine serum albumin and 0.02% Pluronic F127 at 37 °C for 1 hour in the dark at room temperature. ROS generation was recorded at excitation wavelength 488 nm and emission wavelength 525 nm using fluorescence microscopy.

### **Determination of arsenic accumulation in the liver**

The arsenic contents in hepatic tissues of all rats were analyzed following the method as previously described with an atomic fluorescence spectrometry system.

### **Histopathological studies**

The liver was isolated immediately after sacrificing the animal and washed with ice-cold normal saline, trimmed and embedded in paraffin and sliced at 4 μM thickness. Then the sections were stained with hematoxylin

and eosin (HE). The structure was then examined under a light microscope by a pathologist blinded to the groups under study.

### **Nuclear extract preparation**

Nuclear extracts for western blotting was prepared by Nuclear/Cytosol Fractionation Kit (Biovision, Milpitas, CA, USA). Cells were washed with ice-cold PBS and collected by centrifugation at 600×g for 5 min at 4°C. We resuspended cell pellets in 0.2 mL cytosol extraction buffer A containing DTT and protease inhibitors and kept on ice for 10 minutes. The supernatant obtained was added to 11 μL of cytosol extraction buffer B, maintained on ice for 1 min, and centrifuged at 16,000×g for 5 min. The supernatant (cytosol extract) was transferred to a new tube. The pellet (contains nuclei) was resuspended in 100 μL of nuclear extraction buffer mix, vortexed on ice for 15 seconds, and then centrifuged at 16,000×g for 10 min. The supernatant (nuclear extract protein) concentration was measured using the Bradford method for western blotting.

### **Preparation of protein extracts and western blot assay**

Protein was extracted from hepatocyte and liver tissue with RIPA buffer (containing 0.1% PMSF), and equal amounts of protein from each sample (50 μg) were separated by 10% or 12% SDS/PAGE and transferred to polyvinylidene fluoride membranes. The membranes were then incubated with primary antibodies overnight at 4°C, and horseradish peroxidase (HRP)-coupled goat anti-mouse or goat anti-rabbit secondary antibody (sc-2005, 1:2000, sc-2030, 1:5000; Santa Cruz, CA, USA). The chemiluminescence signals were detected with the EasySee Western Blot Kit (Beijing TransGen Biotech, Beijing, China). The densitometric analysis was conducted with Image J 1.43 (National Institutes of Health). Primary antibodies used and their dilution are shown as follows: Nrf2 (1 : 1000), NQO1 (1 : 1000), and HO-1 (1 : 1000), anti-β-actin (1:1000). Blots were then incubated with chemiluminescence reagents (PicoWest Super Signal, Pierce Biotechnology, IL, USA) and visualized using Electrophoresis Gel Imaging Analysis System (MF-ChemiBIS 3.2, DNRBio-Imaging Systems, Israel).

### **Total RNA isolation and quantification of mRNA by RT-PCR**

Total RNA was isolated using RNazol B reagent (Tel-Test, Inc., Friendswood, TX, USA) according to the manufacturer's protocol. The concentration of total RNA in each sample was quantified spectrophotometrically at 260 nm. The integrity of each RNA sample was evaluated by formaldehyde-agarose gel electrophoresis before analysis.

Total RNA was reverse-transcribed into cDNA by High Capacity cDNA Archive Kit (Applied Biosystems, FosterCity, CA, USA), and the resulting cDNA was used for real-time PCR analysis using Power SYBR Green PCR Master Mix in a 7900HT Fast Real-Time PCR System (Applied Biosystems, Foster City, CA, USA). Oligonucleotide primers were designed with Primer3 software.

## Statistical analysis

Data were expressed as mean  $\pm$  SEM and analyzed using a one-way ANOVA followed by Duncan's multiple range test utilizing SPSS 18.0 Software (SAS, NC). The significant level was set at  $P < 0.05$ .

## Abbreviations

EGCG, (-)-Epigallocatechin-3-gallate; Nrf2, nuclear factor erythroid 2-related factor 2; HO-1, heme oxygenase-1; CAT, Catalase; MDA, malonyldialdehyde; SOD, superoxide dismutase; GSH, Glutathione; MTT, 3-(4,5-dimethylthiazol-2-yl)-2,5-diphenyltetrazolium.

## ACKNOWLEDGMENTS

This work was supported by the China Postdoctoral Science Foundation (2015M582352).

## CONFLICTS OF INTEREST

The authors state no conflicts of interest.

## REFERENCES

1. Gupta R, Kannan GM, Sharma M, S Flora SJ. Therapeutic effects of *Moringa oleifera* on arsenic-induced toxicity in rats. *Environ Toxicol Pharmacol*. 2005; 20:456-464.
2. Sharmila Banu G, Kumar G, Murugesan AG. Effects of leaves extract of *Ocimum sanctum* L. on arsenic-induced toxicity in Wistar albino rats. *Food Chem Toxicol*. 2009; 47:490-495.
3. Muthumani M, Miltonprabu S. Ameliorative efficacy of tetrahydrocurcumin against arsenic induced oxidative damage, dyslipidemia and hepatic mitochondrial toxicity in rats. *Chem Biol Interact*. 2015; 235:95-105.
4. Liu D, Duan X, Dong D, Bai C, Li X, Sun G, Li B. Activation of the Nrf2 pathway by inorganic arsenic in human hepatocytes and the role of transcriptional repressor Bach1. *Oxid Med Cell Longev*. 2013; 2013:984546.
5. Agrawal S, Bhatnagar P, Flora SJ. Changes in tissue oxidative stress, brain biogenic amines and acetylcholinesterase following co-exposure to lead, arsenic and mercury in rats. *Food Chem Toxicol*. 2015; 86:208-216.
6. Brunati AM, Pagano MA, Bindoli A, Rigobello MP. Thiol redox systems and protein kinases in hepatic stellate cell regulatory processes. *Free Radic Res*. 2010; 44:363-378.
7. Dutta M, Ghosh D, Ghosh AK, Bose G, Chattopadhyay A, Rudra S, Dey M, Bandyopadhyay A, Pattari SK, Mallick S, Bandyopadhyay D. High fat diet aggravates arsenic induced oxidative stress in rat heart and liver. *Food Chem Toxicol*. 2014; 66:262-277.
8. Singh MK, Dwivedi S, Yadav SS, Sharma P, Khattri S. Arsenic-induced hepatic toxicity and its attenuation by fruit extract of *Emblca officinalis* (amla) in mice. *Indian J Clin Biochem*. 2014; 29:29-37.
9. Lee JM, Johnson JA. An important role of Nrf2-ARE pathway in the cellular defense mechanism. *J Biochem Mol Biol*. 2004; 37:139-143.
10. Nguyen T, Sherratt PJ, Pickett CB. Regulatory mechanisms controlling gene expression mediated by the antioxidant response element. *Annu Rev Pharmacol Toxicol*. 2003; 43:233-260.
11. Na HK, Surh YJ. Modulation of Nrf2-mediated antioxidant and detoxifying enzyme induction by the green tea polyphenol EGCG. *Food Chem Toxicol*. 2008; 46:1271-1278.
12. Wang D, Wang Y, Wan X, Yang CS, Zhang J. Green tea polyphenol (-)-epigallocatechin-3-gallate triggered hepatotoxicity in mice: responses of major antioxidant enzymes and the Nrf2 rescue pathway. *Toxicol Appl Pharmacol*. 2015; 283:65-74.
13. Hosseini MJ, Shaki F, Ghazi-Khansari M, Pourahmad J. Toxicity of arsenic (III) on isolated liver mitochondria: a new mechanistic approach. *Iran J Pharm Res*. 2013; 12:121-138.
14. Xu Z, Wang Z, Li JJ, Chen C, Zhang PC, Dong L, Chen JH, Chen Q, Zhang XT, Wang ZL. Protective effects of selenium on oxidative damage and oxidative stress related gene expression in rat liver under chronic poisoning of arsenic. *Food Chem Toxicol*. 2013; 58:1-7.
15. Durackova Z. Some current insights into oxidative stress. *Physiol Res*. 2010; 59:459-469.
16. Flora SJ, Mittal M, Mehta A. Heavy metal induced oxidative stress & its possible reversal by chelation therapy. *Indian J Med Res*. 2008; 128:501-523.
17. Garcia-Nino WR, Pedraza-Chaverri J. Protective effect of curcumin against heavy metals-induced liver damage. *Food Chem Toxicol*. 2014; 69:182-201.
18. Vajragupta O, Boonchoong P, Berliner LJ. Manganese complexes of curcumin analogues: evaluation of hydroxyl radical scavenging ability, superoxide dismutase activity and stability towards hydrolysis. *Free Radic Res*. 2004; 38:303-314.
19. Escobar J, Varela-Nallar L, Coddou C, Nelson P, Maisey K, Valdes D, Aspee A, Espinosa V, Rozas C, Montoya M, Mandiola C, Rodriguez FE, Acuna-Castillo C, et al.

- Oxidative damage in lymphocytes of copper smelter workers correlated to higher levels of excreted arsenic. *Mediators Inflamm.* 2010; 403830.
20. Aono J, Yanagawa T, Itoh K, Li B, Yoshida H, Kumagai Y, Yamamoto M, Ishii T. Activation of Nrf2 and accumulation of ubiquitinated A170 by arsenic in osteoblasts. *Biochem Biophys Res Commun.* 2003; 305:271-277.
  21. Zhao R, Hou Y, Xue P, Woods CG, Fu J, Feng B, Guan D, Sun G, Chan JY, Waalkes MP, Andersen ME, Pi J. Long isoforms of NRF1 contribute to arsenic-induced antioxidant response in human keratinocytes. *Environ Health Perspect.* 2011; 119:56-62.
  22. Abiko Y, Shinkai Y, Sumi D, Kumagai Y. Reduction of arsenic-induced cytotoxicity through Nrf2/HO-1 signaling in HepG2 cells. *J Toxicol Sci.* 2010; 35:419-423.
  23. Li B, Li X, Zhang X, Zhu B, Liu D, Xing X, Wang X, Ma Y, Sun G. [Effects of inorganic arsenic on mRNA expression of Nrf2 and Nrf2-regulated downstream anti-oxidant enzymes in Chang hepatocytes]. [Article in Chinese]. *Wei Sheng Yan Jiu.* 2011; 40:468-471.
  24. Roggenbeck BA, Carew MW, Charrois GJ, Douglas DN, Kneteman NM, Lu X, Le XC, Leslie EM. Characterization of arsenic hepatobiliary transport using sandwich-cultured human hepatocytes. *Toxicol Sci.* 2015; 145:307-320.
  25. Saha S, Rashid K, Sadhukhan P, Agarwal N, Sil PC. Attenuative role of mangiferin in oxidative stress-mediated liver dysfunction in arsenic-intoxicated murines. *Biofactors.* 2016; 42:515-532.
  26. Jiang T, Huang Z, Chan JY, Zhang DD. Nrf2 protects against As(III)-induced damage in mouse liver and bladder. *Toxicol Appl Pharmacol.* 2009; 240:8-14.
  27. Anwar-Mohamed A, Elshenawy OH, Soshilov AA, Denison MS, Chris Le X, Klotz LO, El-Kadi AO. Methylated pentavalent arsenic metabolites are bifunctional inducers, as they induce cytochrome P450 1A1 and NAD(P)H:quinone oxidoreductase through AhR- and Nrf2-dependent mechanisms. *Free Radic Biol Med.* 2014; 67:171-187.
  28. Sinha D, Biswas J, Bishayee A. Nrf2-mediated redox signaling in arsenic carcinogenesis: a review. *Arch Toxicol.* 2013; 87:383-396.
  29. Sun TL, Liu Z, Qi ZJ, Huang YP, Gao XQ, Zhang YY. (-)-Epigallocatechin-3-gallate (EGCG) attenuates arsenic-induced cardiotoxicity in rats. *Food Chem Toxicol.* 2016; 93:102-110.
